# Supplementary material for: Plasmon photocatalytic CO2 reduction reactions over Au particles on various substrates
Source: Royal Society of Chemistry journal article supplement (doi:10.1039/d3nr02543h), 2023-01-01
Supplement: d3nr02543h1.pdf [file d3nr02543h1.pdf]

Electronic Supplementary Information (ESI) for Nanoscale

This journal is © The Royal Society of Chemistry 2023

## **Plasmon photocatalytic CO<sub>2</sub> reduction reactions over Au particles on various substrates**

Kai Wang<sup>a,b</sup> and Tao He<sup>\*a,b</sup>

<sup>a</sup> CAS Key Laboratory of Nanosystem and Hierarchical Fabrication, National Center for Nanoscience and Technology, Beijing 100190, China. E-mail: het@nanoctr.cn

<sup>b</sup> University of Chinese Academy of Sciences, Beijing 100049, China.

**Fig. S1.** Size distribution of Au particles on the substrates of (a) Au-SiO<sub>2</sub>, (b) Au-n-Si, (c) Au-p-Si, (d) Au-TiO<sub>2</sub>-SiO<sub>2</sub>, (e) Au-TiO<sub>2</sub>-n-Si, and (f) Au-TiO<sub>2</sub>-p-Si.

**Fig. S2.** Histograms of size statistics for Au particles on the substrates of (a-f) Au-SiO<sub>2</sub>, (b) Au-n-Si, (c) Au-p-Si, (d) Au-TiO<sub>2</sub>-SiO<sub>2</sub>, (e) Au-TiO<sub>2</sub>-n-Si, and (f) Au-TiO<sub>2</sub>-p-Si, indicating the size of majority particles is  $(20 \pm 5)$  nm for all the samples.

**Fig. S3.** Optical refractive index and extinction coefficient for different substrates of (a-c) SiO<sub>2</sub>, (b) n-Si, and (c) p-Si. The inset diagrams of (b-c) show the bandgap of n-Si and p-Si, respectively.

**Fig. S4.** Optical properties of TiO<sub>2</sub> on the substrates of SiO<sub>2</sub>, n-Si and p-Si. (a) Refractive index and extinction coefficient spectra, (b) real and imaginary parts of dielectric constant, and (c-e) bandgap determination of TiO<sub>2</sub> from extinction coefficient spectra.

**Fig. S5.** Optical properties of Au on the substrates of SiO<sub>2</sub>, n-Si and p-Si. Spectra of (a) refractive index, (b) extinction coefficient, and (c) real and (d) imaginary parts of dielectric constant.

**Fig. S6.** Optical properties of Au/TiO<sub>2</sub> on the substrates of SiO<sub>2</sub>, n-Si and p-Si. Spectra of (a) refractive index, (b) extinction coefficient, (c) real and (d) imaginary parts of dielectric constant.

**Fig. S7.** UV-vis absorption spectrum of 10<sup>-6</sup> mol/L R6G with a strong absorption peak at 527 nm.

**Fig. S8.** Photoelectrochemical characteristics of Au and Au/TiO<sub>2</sub> on n-Si. (a) Transient photocurrent density vs time for different samples and (b) schematic diagram of photocurrent generation and charge transfer for Au-TiO<sub>2</sub>-n-Si sample under visible-light illumination.

**Fig. S9.** Temperature distribution on the sample surface of (a,b) SiO<sub>2</sub> and (c,d) Au-SiO<sub>2</sub> (a,c) before and (b,d) after visible-light irradiation.

**Fig. S10.** Alignment of energy levels for R6G, Au, Si, TiO<sub>2</sub> and SiO<sub>2</sub>, with respect to the level of vacuum (left) and NHE (right). The red dashed lines are the respective redox potentials of CO<sub>2</sub>/CO and CO<sub>2</sub>/CH<sub>4</sub>.

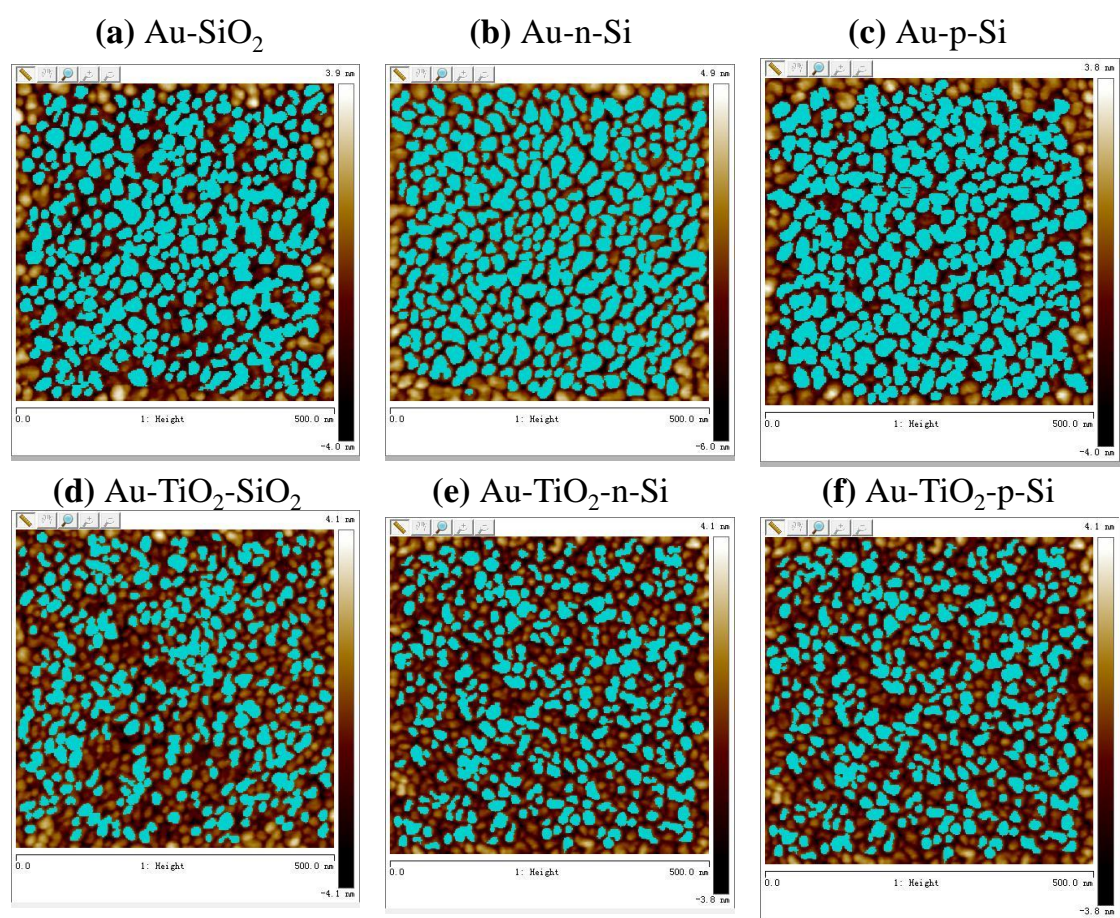

**Fig. S1.** Size distribution of Au particles on the substrates of (a) Au-SiO<sub>2</sub>, (b) Au-n-Si, (c) Au-p-Si, (d) Au-TiO<sub>2</sub>-SiO<sub>2</sub>, (e) Au-TiO<sub>2</sub>-n-Si, and (f) Au-TiO<sub>2</sub>-p-Si.

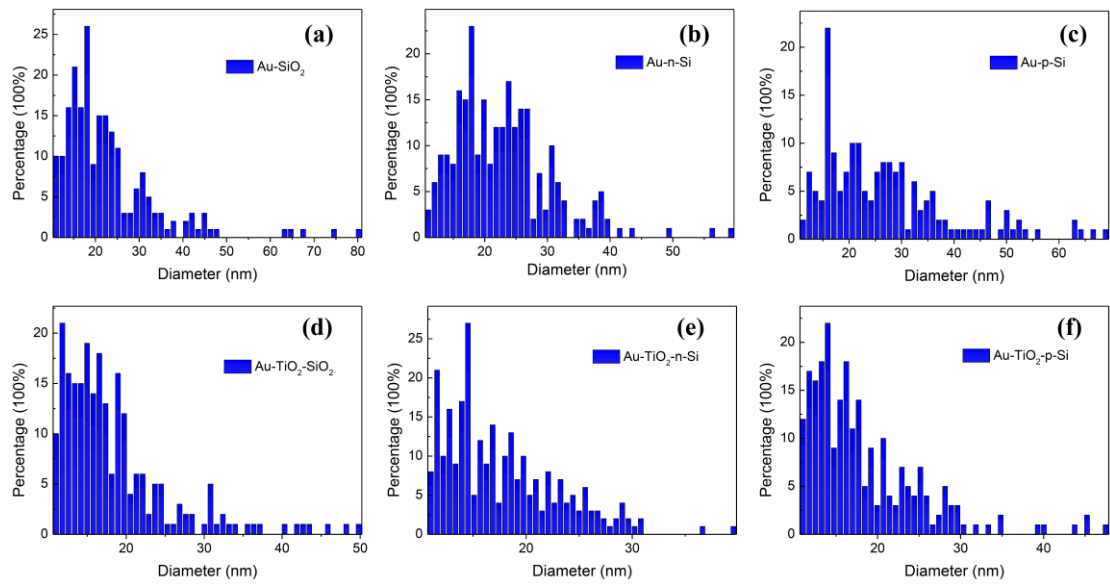

**Fig. S2.** Histograms of size statistics for Au particles on the substrates of (a-f) Au-SiO<sub>2</sub>, (b) Au-n-Si, (c) Au-p-Si, (d) Au-TiO<sub>2</sub>-SiO<sub>2</sub>, (e) Au-TiO<sub>2</sub>-n-Si, and (f) Au-TiO<sub>2</sub>-p-Si, indicating the size of majority particles is  $(20 \pm 5)$  nm for all the samples.

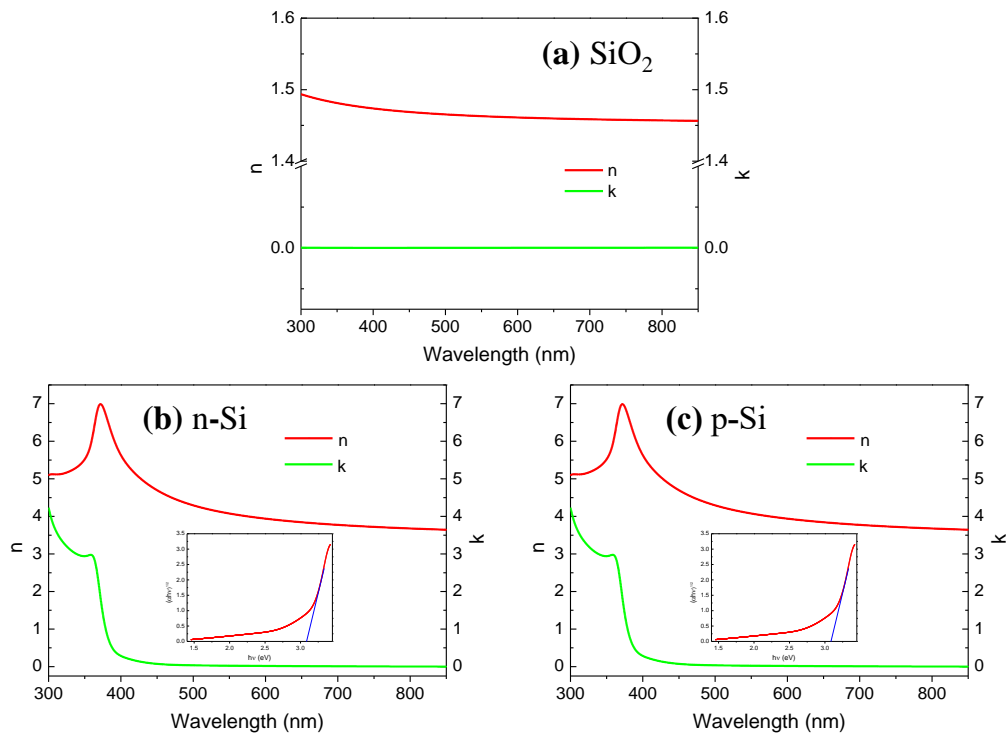

**Fig. S3.** Optical refractive index and extinction coefficient for different substrates of (a-c)  $\text{SiO}_2$ , (b) n-Si, and (c) p-Si. The inset diagrams of (b-c) show the bandgap of n-Si and p-Si, respectively.

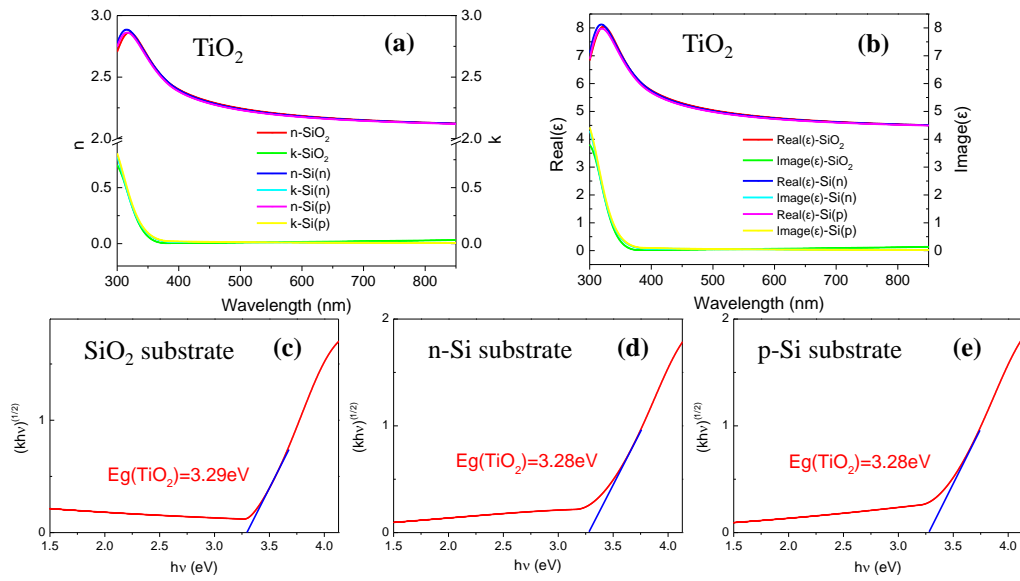

**Fig. S4.** Optical properties of TiO<sub>2</sub> on the substrates of SiO<sub>2</sub>, n-Si and p-Si. (a) Refractive index and extinction coefficient spectra, (b) real and imaginary parts of dielectric constant, and (c-e) bandgap determination of TiO<sub>2</sub> from extinction coefficient spectra.

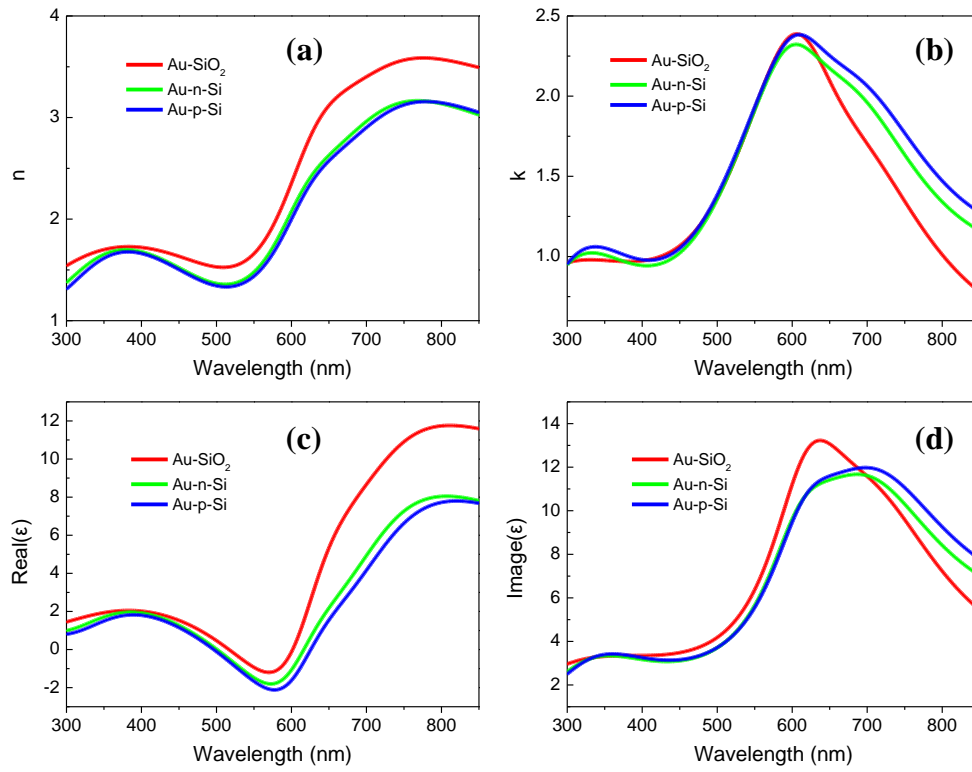

**Fig. S5.** Optical properties of Au on the substrates of SiO<sub>2</sub>, n-Si and p-Si. Spectra of (a) refractive index, (b) extinction coefficient, and (c) real and (d) imaginary parts of dielectric constant.

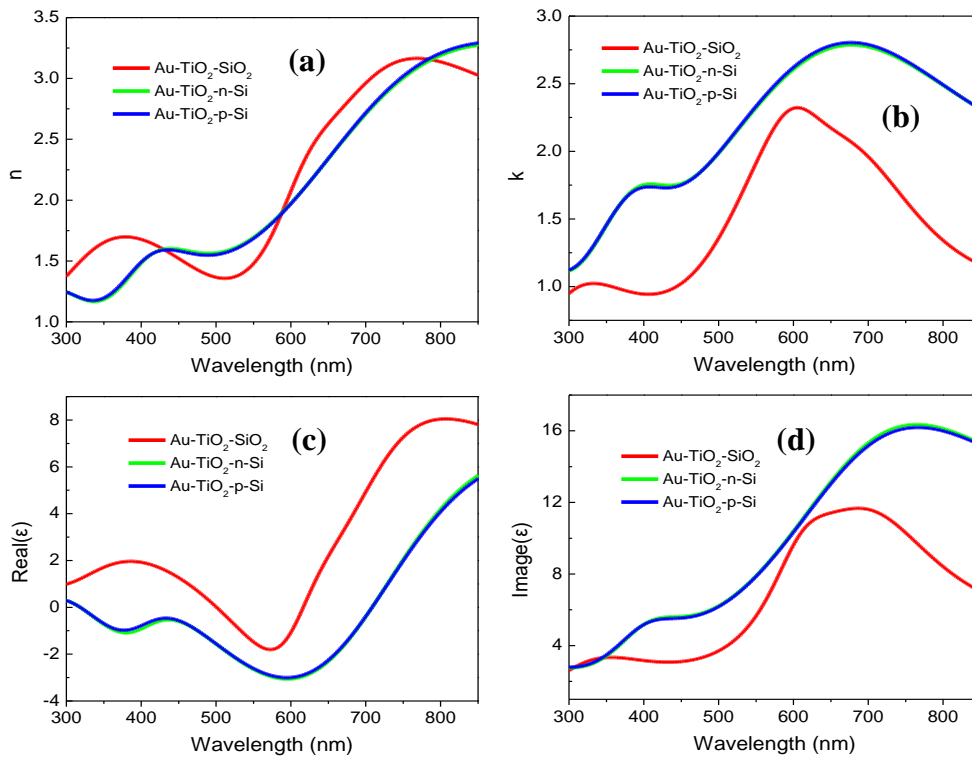

**Fig. S6.** Optical properties of Au/TiO<sub>2</sub> on the substrates of SiO<sub>2</sub>, n-Si and p-Si. Spectra of (a) refractive index, (b) extinction coefficient, (c) real and (d) imaginary parts of dielectric constant.



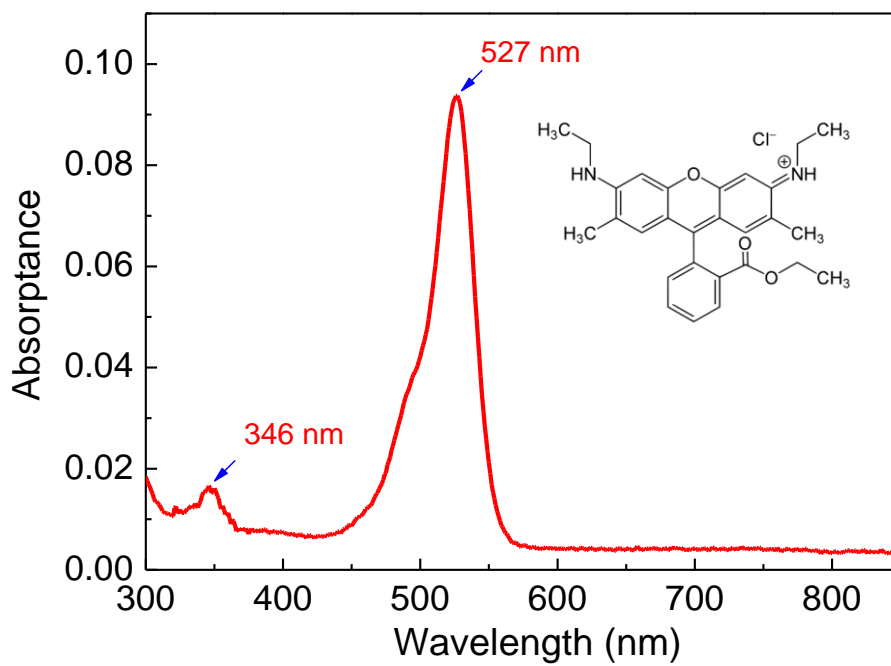

Fig. S7. UV-vis absorption spectrum of  $10^{-6}$  mol/L R6G with a strong absorption peak at 527 nm.

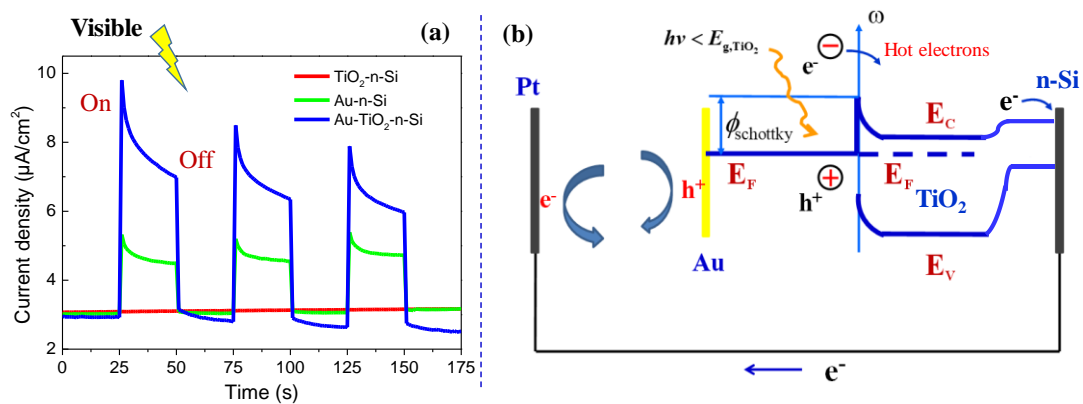

**Fig. S8.** Photoelectrochemical characteristics of Au and Au/ $\text{TiO}_2$  on n-Si. (a) Transient photocurrent density vs time for different samples and (b) schematic diagram of photocurrent generation and charge transfer for Au- $\text{TiO}_2$ -n-Si sample under visible-light illumination.

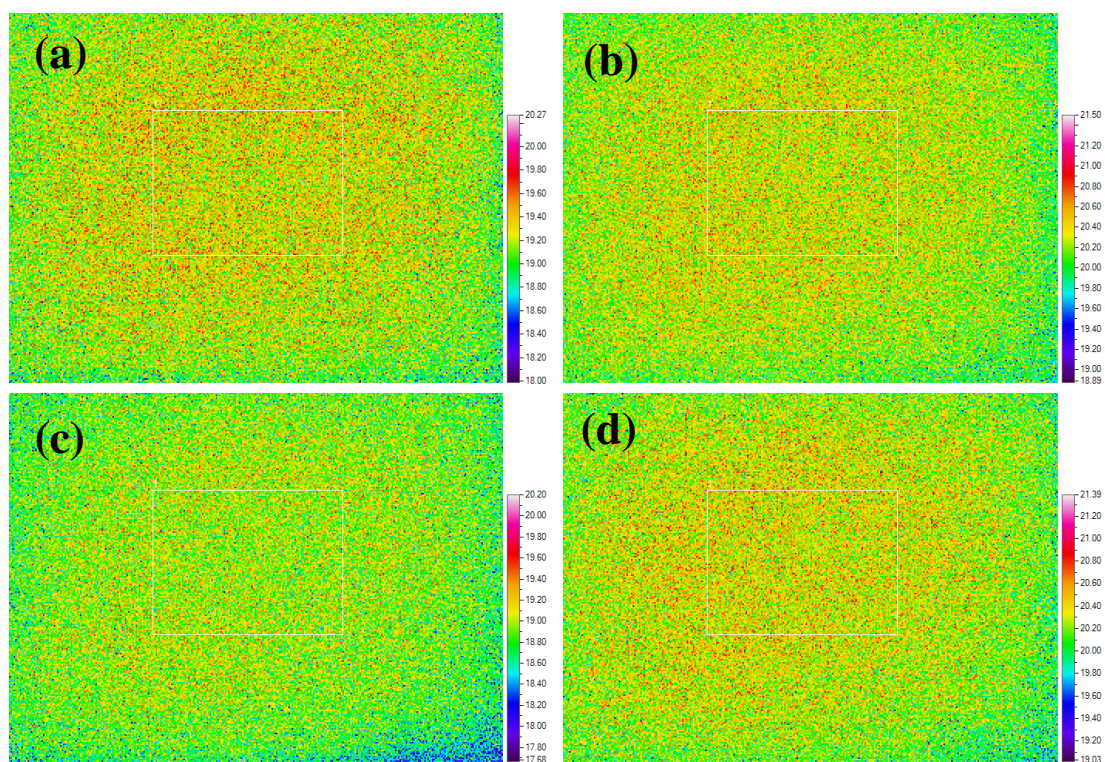

**Fig. S9.** Temperature distribution on the sample surface of (a,b) SiO<sub>2</sub> and (c,d) Au-SiO<sub>2</sub> (a,c) before and (b,d) after visible-light irradiation.

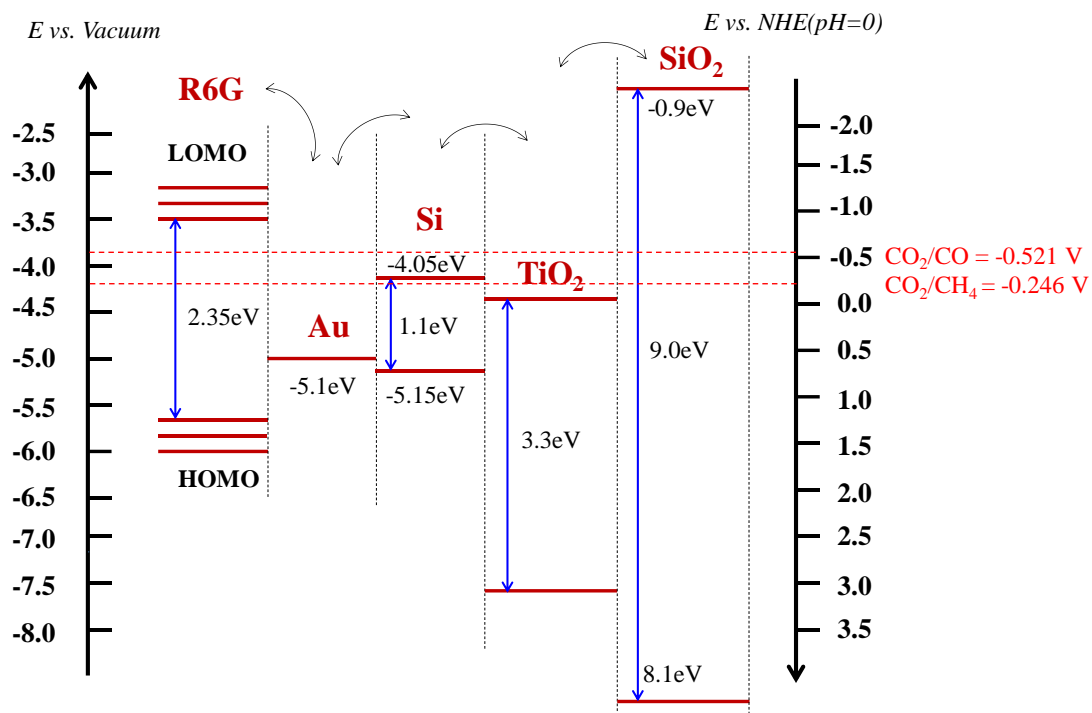

**Fig. S10.** Alignment of energy levels for R6G, Au, Si, TiO<sub>2</sub> and SiO<sub>2</sub>, with respect to the level of vacuum (left) and NHE (right). The red dashed lines are the respective redox potentials of CO<sub>2</sub>/CO and CO<sub>2</sub>/CH<sub>4</sub>.
